# Supplementary material for: Tools for ‘safety netting’ in common paediatric illnesses: a systematic review in emergency care
Source: HighWire-hosted journal article supplement (doi:10.1136/archdischild-2014-306953), 2015-07-10
Supplement: archdischild-2014-306953supp1.pdf [file archdischild-2014-306953supp1.pdf]

## **Supplemental information 1a: systematic review search strategy**

### **Embase**

((('hospital readmission'/de OR (readmiss\* OR reattend\* OR rehospital\* OR revisit\* OR ((re OR second OR return\* OR repeat\* OR recur\*) NEAR/3 (admiss\* OR attend\* OR visit\* OR hospital\* OR emergenc\* OR present\*)) OR (safe\* NEAR/3 net\*)):ab,ti) OR (('hospital discharge'/de OR (discharge\* OR postdischarge\*):ab,ti) AND ('evaluation and follow up'/de OR 'health care quality'/exp OR evaluation/de OR 'follow up'/de OR (evaluat\* OR (follow\* NEXT/1 up) OR followup):ab,ti))) AND ('emergency ward'/de OR 'emergency patient'/de OR 'emergency treatment'/de OR 'first aid'/de OR 'emergency care'/de OR 'emergency health service'/de OR 'emergency medicine'/de OR (emergen\* OR 'first aid'):ab,ti) AND (child/exp OR newborn/exp OR adolescent/exp OR adolescence/exp OR 'child behavior'/de OR 'child parent relation'/de OR (adolescen\* OR infan\* OR newborn\* OR (new NEXT/1 born\*) OR baby OR babies OR neonat\* OR child\* OR kid OR kids OR toddler\* OR teen\* OR boy\* OR girl\* OR minors OR underag\* OR (under NEXT/1 ag\*) OR juvenil\* OR youth\* OR kindergar\* OR puber\* OR pubescen\* OR prepubescen\* OR prepubert\* OR paediatric\* OR paediatric\* OR school\* OR preschool\* OR highschool\*):ab,ti) AND (infection/exp OR fever/de OR dyspnea/exp OR gastroenteritis/de OR vomiting/de OR diarrhea/exp OR (infecti\* OR virus\* OR viral OR bacterial OR fever OR febril\* OR dyspne\* OR dyspnoe\* OR gastroenterit\* OR vomit\* OR diarrh\*):ab,ti)

### **Medline OvidSP**

((("Patient Readmission"/ OR (readmiss\* OR reattend\* OR rehospital\* OR revisit\* OR ((re OR second OR return\* OR repeat\* OR recur\*) ADJ3 (admiss\* OR attend\* OR visit\* OR hospital\* OR emergenc\* OR present\*)) OR (safe\* ADJ3 net\*)),ab,ti.) OR (("Patient Discharge"/ OR (discharge\* OR postdischarge\*).ab,ti.) AND ("Program Evaluation"/ OR Evaluation Studies.pt. OR exp "Quality of Health Care"/ OR "Follow-Up Studies"/ OR (evaluat\* OR (follow\* ADJ up) OR followup).ab,ti.))) AND ("Emergency Service, Hospital"/ OR "Emergency Medical Services"/ OR "emergency treatment"/ OR "emergency medicine"/ OR "first aid"/ OR (emergen\* OR "first aid").ab,ti.) AND (exp child/ OR exp infant/ OR adolescent/ OR exp "child behavior"/ OR exp "Parent-Child Relations"/ OR (adolescen\* OR infan\* OR newborn\* OR (new ADJ born\*) OR baby OR babies OR neonat\* OR child\* OR kid OR kids OR toddler\* OR teen\* OR boy\* OR girl\* OR minors OR underag\* OR (under ADJ ag\*) OR juvenil\* OR youth\* OR kindergar\* OR puber\* OR pubescen\* OR prepubescen\* OR prepubert\* OR paediatric\* OR paediatric\* OR school\* OR preschool\* OR highschool\*).ab,ti.) AND (exp infection/ OR exp fever/ OR exp dyspnea/ OR gastroenteritis/ OR vomiting/ OR exp diarrhea/ OR (infecti\* OR virus\* OR viral OR bacterial OR fever OR febril\* OR dyspne\* OR dyspnoe\* OR gastroenterit\* OR vomit\* OR diarrh\*).ab,ti.)

### **Cochrane central**

((readmiss\* OR reattend\* OR rehospital\* OR revisit\* OR ((re OR second OR return\* OR repeat\* OR recur\*) NEAR/3 (admiss\* OR attend\* OR visit\* OR hospital\* OR emergenc\* OR present\*)) OR (safe\* NEAR/3 net\*)):ab,ti) OR (((discharge\* OR postdischarge\*):ab,ti) AND ((evaluat\* OR (follow\* NEXT/1 up) OR followup):ab,ti))) AND ((emergen\* OR 'first aid'):ab,ti) AND ((adolescen\* OR infan\* OR newborn\* OR (new NEXT/1 born\*) OR baby OR babies OR neonat\* OR child\* OR kid OR kids OR toddler\* OR teen\* OR boy\* OR girl\* OR minors OR underag\* OR (under NEXT/1 ag\*) OR juvenil\* OR youth\* OR kindergar\* OR puber\* OR pubescen\* OR prepubescen\* OR prepubert\* OR paediatric\* OR paediatric\* OR school\* OR preschool\* OR highschool\*):ab,ti) AND ((infecti\* OR virus\* OR viral OR bacterial OR fever OR febril\* OR dyspne\* OR dyspnoe\* OR gastroenterit\* OR vomit\* OR diarrh\*):ab,ti)

### **Web-of-Science**

TS=(((readmiss\* OR reattend\* OR rehospital\* OR revisit\* OR ((re OR second OR return\* OR repeat\* OR recur\*) NEAR/3 (admiss\* OR attend\* OR visit\* OR hospital\* OR emergenc\* OR present\*)) OR (safe\* NEAR/3 net\*))) OR (((discharge\* OR postdischarge\*)) AND ((evaluat\* OR (follow\* NEXT/1 up) OR followup)))) AND ((emergen\* OR "first aid")) AND ((adolescen\* OR infan\* OR newborn\* OR (new NEXT/1 born\*) OR baby OR babies OR neonat\* OR child\* OR kid OR kids OR toddler\* OR teen\* OR boy\* OR girl\* OR minors OR underag\* OR under age\* OR juvenil\* OR youth\* OR kindergar\* OR puber\* OR pubescen\* OR prepubescen\* OR prepubert\* OR paediatric\* OR paediatric\* OR school\* OR preschool\* OR highschool\*)) AND ((infecti\* OR virus\* OR viral OR bacterial OR fever OR febril\* OR dyspne\* OR dyspnoe\* OR gastroenterit\* OR vomit\* OR diarrh\*))

### **PubMed as publisher**

((readmiss\*[tiab] OR reattend\*[tiab] OR rehospital\*[tiab] OR revisit\*[tiab] OR ((re[tiab] OR second[tiab] OR return\*[tiab] OR repeat\*[tiab] OR recur\*[tiab]) AND (admiss\*[tiab] OR attend\*[tiab] OR visit\*[tiab] OR hospital\*[tiab] OR emergenc\*[tiab] OR present\*[tiab])) OR safety net\*[tiab])) OR (((discharge\*[tiab] OR postdischarge\*[tiab])) AND ((evaluat\*[tiab] OR follow up[tiab] OR followup[tiab]))) AND ((emergen\*[tiab] OR first aid[tiab])) AND ((adolescen\*[tiab] OR infan\*[tiab] OR newborn\*[tiab] OR new born\*[tiab] OR baby[tiab] OR babies[tiab] OR neonat\*[tiab] OR child\*[tiab] OR kid[tiab] OR kids[tiab] OR toddler\*[tiab] OR teen\*[tiab] OR boy\*[tiab] OR girl\*[tiab] OR minors[tiab] OR underag\*[tiab] OR under ag\*[tiab] OR juvenil\*[tiab] OR youth\*[tiab] OR kindergar\*[tiab] OR puber\*[tiab] OR pubescen\*[tiab] OR prepubescen\*[tiab] OR prepubert\*[tiab] OR paediatric\*[tiab] OR paediatric\*[tiab] OR school\*[tiab] OR preschool\*[tiab] OR highschool\*[tiab])) AND ((infection\*[tiab] OR infectious\*[tiab] OR virus\*[tiab] OR viral OR bacterial OR fever OR febril\*[tiab] OR dyspne\*[tiab] OR dyspnoe\*[tiab] OR gastroenterit\*[tiab] OR vomit\*[tiab] OR diarrh\*[tiab])) AND publisher[sb]

### **CINAHL**

((MH "Readmission"+ OR (readmiss\* OR reattend\* OR rehospital\* OR revisit\* OR ((re OR second OR return\* OR repeat\* OR recur\*) N3 (admiss\* OR attend\* OR visit\* OR hospital\* OR emergenc\* OR present\*)) OR (safe\* N3 net\*))) OR ((MH "Patient Discharge"+ OR (discharge\* OR postdischarge\*)) AND (MH "Program Evaluation"+ OR MH "Quality of Health Care"+ OR MH "Prospective Studies"+ OR (evaluat\* OR (follow\* N up) OR followup)))) AND (MH "Emergency Service "+ OR MH "Emergency Treatment (Non-Cinahl)" + OR MH "emergency medicine"+ OR (emergen\* OR "first aid")) AND (MH child+ OR MH infant+ OR adolescent+ OR MH "child behavior"+ OR MH "Parent-Child Relations"+ OR (adolescen\* OR infan\* OR newborn\* OR (new N born\*) OR baby OR babies OR neonat\* OR child\* OR kid OR kids OR toddler\* OR teen\* OR boy\* OR girl\* OR minors OR underag\* OR (under N ag\*) OR juvenil\* OR youth\* OR kindergar\* OR puber\* OR pubescen\* OR prepubescen\* OR prepubert\* OR paediatric\* OR paediatric\* OR school\* OR preschool\* OR highschool\*)) AND (MH infection+ OR MH fever+ OR MH dyspnea+ OR MH gastroenteritis OR MH vomiting+ OR MH diarrhea+ OR (infecti\* OR virus\* OR viral OR bacterial OR fever OR febril\* OR dyspne\* OR dyspnoe\* OR gastroenterit\* OR vomit\* OR diarrh\*))

## Google Scholar

(readmission|reattendance|rehospitalization|"safety (netting|net)") (emergency|"first aid")  
(child|newborn|adolescent|adolescence|baby|babies|neonates|children)  
(infection|fever|dyspnea|gastroenteritis|vomiting|diarrhea|virus|virussus|viral|bacterial)

**Supplemental information 1b:** number of articles per database

| <b>Database</b>     | <b>Number of articles</b> | <b>Number of articles after deleting duplicates</b> |
|---------------------|---------------------------|-----------------------------------------------------|
| Embase              | 1842                      | 1835                                                |
| Medline OvidSP      | 1268                      | 425                                                 |
| Web-of-Science      | 538                       | 131                                                 |
| CINAHL              | 199                       | 25                                                  |
| Cochrane central    | 54                        | 3                                                   |
| PubMed as publisher | 28                        | 23                                                  |
| Google Scholar      | 200                       | 162                                                 |
|                     | <b>4129</b>               | <b>2604</b>                                         |
