# Supplementary material for: Tools for ‘safety netting’ in common paediatric illnesses: a systematic review in emergency care
Source: HighWire-hosted journal article supplement (doi:10.1136/archdischild-2014-306953), 2015-07-10
Supplement: archdischild-2014-306953supp3.pdf [file archdischild-2014-306953supp3.pdf]

**Supplemental information 3a: Detailed study information about safety netting after ED discharge**

|                                                            | Univariable                |                                                                                                                                                                                      | Multivariable                                               |                              | Best evidence synthesis |                   |
|------------------------------------------------------------|----------------------------|--------------------------------------------------------------------------------------------------------------------------------------------------------------------------------------|-------------------------------------------------------------|------------------------------|-------------------------|-------------------|
|                                                            | Low risk of bias           | High risk of bias                                                                                                                                                                    | Low risk of bias                                            | High risk of bias            | Association             | Level of evidence |
| <i>Approach of safety netting management</i>               |                            |                                                                                                                                                                                      |                                                             |                              |                         |                   |
| Follow-up program                                          |                            | yes (2)<br>Augustine 2013 (all)<br>O'Neill 2001 (all)                                                                                                                                |                                                             |                              | Yes                     | Moderate          |
| Clinical pathways at initial ED visit                      |                            | yes (1)<br>Browne 2001 (spec)                                                                                                                                                        |                                                             |                              | Yes                     | Limited           |
| Non-compliance to scheduled revisit                        |                            | yes (1)<br>Scarfone 1996 (all)                                                                                                                                                       |                                                             |                              | Yes                     | Limited           |
| Explicit and consistent safety netting advice <sup>^</sup> |                            | yes (4)<br>Augustine 2013 (all)<br>Maguire 2011 (fever)<br>Moineau 2004 (spec)<br>Porter 1999 (all)<br>no (3)<br>Fagbuyi, 2011 (spec)<br>Liberman 2012 (spec)<br>Roland 2011 (fever) |                                                             |                              | unclear                 | Conflicting       |
| Educational intervention <sup>*</sup>                      |                            | yes (3)<br>Considine 2007 (fever)<br>Ismail 2013 (fever)<br>O'Neill 2001 (fever)<br>no (3)<br>Chande 1996 (all)<br>Fagbuyi, 2011 (spec)<br>Lawrence 2009 (all)                       | yes (1)<br>Bloch 2013 (all)<br>no (1)<br>Baker 2009 (fever) | yes (1)<br>Patel 2009 (spec) | unclear                 | Conflicting       |
| Telephone follow-up                                        | no (1)<br>Horne 1995 (all) | yes (1)<br>Yang 2011 (all)                                                                                                                                                           |                                                             |                              | unclear                 | Conflicting       |

Legend supplemental information 4a: see supplemental information 4c

## Supplemental information 3b: Detailed study information about determinants of revisits

|                                              | Univariable                                                                                                                   |                                                                                                                                                                                                                           | Multivariable                                                                                                                       |                                                              | Best evidence synthesis |                   |
|----------------------------------------------|-------------------------------------------------------------------------------------------------------------------------------|---------------------------------------------------------------------------------------------------------------------------------------------------------------------------------------------------------------------------|-------------------------------------------------------------------------------------------------------------------------------------|--------------------------------------------------------------|-------------------------|-------------------|
|                                              | Low risk of bias                                                                                                              | High risk of bias                                                                                                                                                                                                         | Low risk of bias                                                                                                                    | High risk of bias                                            | Association             | Level of evidence |
| <b>DETERMINANTS OF REVISITS</b>              |                                                                                                                               |                                                                                                                                                                                                                           |                                                                                                                                     |                                                              |                         |                   |
| <b>CHILD CHARACTERISTICS</b>                 |                                                                                                                               |                                                                                                                                                                                                                           |                                                                                                                                     |                                                              |                         |                   |
| Younger children                             | yes (5)<br>Alessandrini 2004 (all)<br>Easter 2012 (all)<br>Goldman 2006 (all)<br>Liberman 2012 (spec)<br>Zimmerman 1996 (all) | yes (4)<br>Black 2010 (all)<br>Logue 2013 (all)<br>Maguire 2011 (fever)<br>O'Loughlin 2012 (all)<br>no (3)<br>Angoulvant 2013 (all)<br>Goldman 2011 (all)<br>Roback 1997 (spec)                                           | yes (4)<br>Berry 2013 (all)<br>Gallagher 2013 (all)<br>Freedman (spec)<br>Mansbach 2008 (spec)<br>no (1)<br>Jacobstein 2002 (fever) | yes (2)<br>Gregor 2009 (spec)<br>LeDuc2006 (all)             | <b>Yes</b>              | <b>Strong</b>     |
| Medical history <sup>1</sup>                 |                                                                                                                               | yes (1)<br>Maguire 2011 (fever)<br>no (1)<br>Roback 1997 (spec)                                                                                                                                                           | yes (3)<br>Berry 2013 (all)<br>Mansbach 2008 (spec)<br>Jacobstein 2002 (fever)                                                      | yes (1)<br>Gregor 2009 (spec)                                | <b>Yes</b>              | <b>Strong</b>     |
| Gender                                       | no (2)<br>Liberman 2012 (spec)<br>Zimmerman 1996 (all)                                                                        | no (3)<br>Angoulvant 2013 (all)<br>Goldman 2011 (all)<br>Roback 1997 (spec)                                                                                                                                               | no (1)<br>Mansbach 2008 (spec)                                                                                                      | no (1)<br>LeDuc2006 (all)                                    | <b>No</b>               | <b>Strong</b>     |
| Ethnicity <sup>=</sup>                       | yes (1)<br>Zimmerman 1996 (all)                                                                                               |                                                                                                                                                                                                                           | yes (1)<br>Berry 2013 (all)<br>no (2)<br>Jacobstein 2002 (fever)<br>Mansbach 2008 (spec)                                            | yes (1)<br>LeDuc2006 (all)                                   | unclear                 | Conflicting       |
| Change on pedsQL scores                      |                                                                                                                               |                                                                                                                                                                                                                           |                                                                                                                                     | yes (1)<br>Mistry 2009 (fever)                               | <b>Yes</b>              | Limited           |
| <b>SOCIAL/ DEMOGRAPHIC CHARACTERISTICS</b>   |                                                                                                                               |                                                                                                                                                                                                                           |                                                                                                                                     |                                                              |                         |                   |
| Emergency crowding <sup>+</sup>              | no (1)<br>Alessandrini 2004 (all)<br>yes (2)<br>Callery 2010 (all)<br>Easter 2012 (all)                                       |                                                                                                                                                                                                                           | yes (1)<br>Goldman 2006 (all)<br>Gallagher 2013 (all)<br>no (2)<br>Jacobstein 2002 (fever)                                          | yes (1)<br>Michelson 2012 (all)<br>no (1)<br>LeDuc2006 (all) | unclear                 | Conflicting       |
| Low SES <sup>##</sup>                        | no (2)<br>Callery 2010 (all)<br>Liberman 2012 (spec)<br>yes (1)<br>Zimmerman 1996 (all)                                       |                                                                                                                                                                                                                           | no (1)<br>Gallagher 2013 (all)<br>yes (2)<br>Berry 2013 (all)<br>Jacobstein 2002 (fever)                                            | no (2)<br>Gregor 2009 (spec)<br>LeDuc 2006 (all)             | unclear                 | Conflicting       |
| Characteristics care givers <sup>#</sup>     | no (1)<br>Liberman 2012 (spec)                                                                                                | yes (5)<br>Augustine 2013 (all)<br>Logue 2013 (all)<br>Lal 1999 (all)<br>Maguire 2011 (fever)<br>Simmons 2012 (all)<br>no (4)<br>Angoulvant 2013 (all)<br>Goldman 2011 (all)<br>Mistry 2007 (fever)<br>Roback 1997 (spec) | yes (1)<br>Gallagher 2013 (all)<br>no (1)<br>Jacobstein 2002 (fever)                                                                | yes (2)<br>Gregor 2009 (spec)<br>Samuels-Kalow 2013 (fever)  | unclear                 | Conflicting       |
| <b>DISEASE CHARACTERISTICS</b>               |                                                                                                                               |                                                                                                                                                                                                                           |                                                                                                                                     |                                                              |                         |                   |
| Symptoms of infectious diseases <sup>*</sup> | yes (4)<br>Alessandrini 2004 (all)<br>Callery 2010 (all)<br>Easter 2012 (all)<br>Liberman 2012 (spec)                         | yes (8)<br>Angoulvant 2013 (all)<br>Augustine 2013 (all)<br>Black 2010 (all)<br>Hacking 2012 (all)<br>Klein-Kremer 2011                                                                                                   | yes (2)<br>Berry 2013 (all)<br>Mansbach 2008 (spec)                                                                                 | no (1)<br>LeDuc2006 (all)                                    | <b>Yes</b>              | <b>Strong</b>     |

|                                                    |                                                                                  |                                                                                                                                                                                                                                                                                                  |                                                                                                          |                              |         |             |
|----------------------------------------------------|----------------------------------------------------------------------------------|--------------------------------------------------------------------------------------------------------------------------------------------------------------------------------------------------------------------------------------------------------------------------------------------------|----------------------------------------------------------------------------------------------------------|------------------------------|---------|-------------|
| Respiratory symptoms**                             | yes (3)<br>Alessandrini 2004 (all)<br>Callery 2010 (all)<br>Zimmerman 1996 (all) | (fever)<br>Logue 2013 (all)<br>Mintegui 2000 (all)<br>Simmons 2012 (all)<br>yes (4)<br>Hacking (2012)<br>Klein-Kremer 2011<br>Lal 1999 (all)<br>Mintegui 2000 (all)<br>no (2)<br>Angoulvant 2013 (all)<br>Roback 1997 (spec)                                                                     | yes (2)<br>Berry 2013 (all)<br>Mansbach 2008 (spec)                                                      |                              | Yes     | Strong      |
| Seizure and other nervous system                   | yes (1)<br>Easter 2012 (all)                                                     |                                                                                                                                                                                                                                                                                                  | yes (1)<br>Berry 2013 (all)                                                                              | yes (1)<br>LeDuc2006 (all)   | Yes     | Strong      |
| Progression/persistence of symptoms^               | yes (3)<br>Ali 2012 (all)<br>DePiero 2002 (all)<br>Easter 2012 (all)             | yes (9)<br>Augustine 2013 (all)<br>Dunlop 2005 (fever)<br>Klein-Kremer.2011 (fever)<br>Lal 1999 (all)<br>Logue 2013 (all)<br>Maguire 2011 (fever)<br>Mistry 2007 (fever)<br>Moineau 2004 (spec)<br>Roggen 2012 (all)<br>no (3)<br>Hacking 2012 (all)<br>Roback 1997 (spec)<br>Goldman 2011 (all) | yes (1)<br>Freedman (spec)<br>no (1)<br>Mansbach 2008 (spec)                                             |                              | Yes     | Strong      |
| Trauma/ surgery                                    | yes (1)<br>Alessandrini 2004 (all)<br>no (1)<br>Zimmerman 1996 (all)             | no (1)<br>Klein-Kremer 2011 (fever)                                                                                                                                                                                                                                                              | yes (1)<br>Berry 2013 (all)                                                                              |                              | unclear | Conflicting |
| Acute triage category/ Illness acuity <sup>s</sup> | yes (1)<br>Alessandrini 2004 (all)<br>no (1)<br>Lieberman 2012 (spec)            | yes (2)<br>Goldman 2011 (all)<br>Logue 2013 (all)<br>no (1)<br>Moineau 2004 (spec)                                                                                                                                                                                                               | yes (4)<br>Freedman 2013 (spec)<br>Gallagher 2013 (all)<br>Goldman 2006 (all)<br>Jacobstein 2002 (fever) | no (1)<br>Gregor 2009 (spec) | unclear | Conflicting |
| Change in working diagnosis                        |                                                                                  | yes (1)<br>Mintegui 2000 (all)<br>no (1)<br>Goldman 2011 (all)                                                                                                                                                                                                                                   |                                                                                                          |                              | unclear | Conflicting |
| Pain/ soreness                                     |                                                                                  | yes (1)<br>Klein-Kremer 2011 (fever)<br>no (1)<br>Angoulvant 2013 (all)                                                                                                                                                                                                                          |                                                                                                          |                              | unclear | Conflicting |

#### PHYSICIAN CHARACTERISTICS

|                             |                              |                                                  |                                                         |  |    |        |
|-----------------------------|------------------------------|--------------------------------------------------|---------------------------------------------------------|--|----|--------|
| Characteristics physician~~ | yes (1)<br>Seow 2007 (fever) | no (2)<br>Chang 2008 (all)<br>Roback 1997 (spec) | no (2)<br>Gaucher 2012 (all)<br>Jacobstein 2002 (fever) |  | No | Strong |
|-----------------------------|------------------------------|--------------------------------------------------|---------------------------------------------------------|--|----|--------|

#### PROCESS CHARACTERISTICS

|                                              |                             |                                                                                                                         |                           |                              |    |          |
|----------------------------------------------|-----------------------------|-------------------------------------------------------------------------------------------------------------------------|---------------------------|------------------------------|----|----------|
| Diagnostic tests/ therapeutic intervention^^ |                             | no (3)<br>Angoulvant 2013 (all)<br>Klein-Kremer 2011 (fever)<br>Mistry 2007 (fever)<br>yes (1)<br>Angoulvant 2013 (all) | no (1)<br>Jain 2010 (all) | no (1)<br>Florin 2013 (spec) | No | Strong   |
| Hospitalisation                              | no (1)<br>Small 2005 (spec) |                                                                                                                         |                           |                              | No | Moderate |
| Hospital at home care                        |                             | no (1)<br>Sartain 2002 (all)                                                                                            |                           |                              | No | Limited  |

Legend supplemental information 4b: see supplemental information 4c

### **Supplemental information 3c:** explaining determinant-differences of all included studies

All: all disease studied;

Fever: febrile patients studied;

Spec: disease specific studies, e.g. respiratory tract infections, gastroenteritis, bronchiolitis, influenza-like illness

<sup>^</sup> *Explicit and consistent safety netting advice, including:*

- Generic discharge instructions (Augustine 2013)
- Pre-printed discharge prescription and instructions (Fagbuyi 2011)
- Discharge information sheets (Moineau 2004)

<sup>\*</sup> *Educational intervention, including:*

- Classroom-style parent discharge education (Fagbuyi 2011)
- Evidence-based education of emergency nurses on parental advice regarding fever management (Considine 2007)
- Video discharge instructions (Bloch 2013; Ismail 2013)
- Computer-generated diagnosis-specific discharge instructions (Lawrence 2009)
- Verbal reinforcement of written discharge instructions by a bilingual discharge facilitator (Patel 2009)

<sup>=</sup> *Ethnicity, including:*

- Hispanic vs white (LeDuc 2006; Zimmerman 1996)
- Black vs other (Jacobstein 2002)
- Non-white vs white (Mansbach 2008)
- Black and Latino vs white (Berry 2013)

<sup>l</sup> *Medical history, including:*

- History of intubation and/or eczema (Mansbach 2008)
- No ED visit during past week (Mansbach 2008)
- History of wheezing and family history of asthma (Roback 1997)
- Chronic condition indicator (CCI) group and CCI count (Berry 2013)
- Prior ED use (Gregor 2009)
- Chronic disease (Jacobstein 2002)
- Anemia or neutropenia (Berry 2013)
- Sickle cell anemia crisis (Berry 2013)

<sup>#</sup> *Characteristics care givers, including:*

- Caregivers age; education status; employment status (Jacobstein 2002)
- Living near hospital/ primary care physician (Jacobstein 2002; Liberman et al. 2012)
- Family demographics: age primary caregiver; marital status; presence and age of other children; presence of other caregivers (Mistry 2007)
- Language spoken at home (Gallagher 2013; Goldman 2011; Samuels 2013)
- Parental perception of illness (Maguire 2011; Lal 1999)
- Single caregivers (Gregor et al. 2009)
- Consultation with sibling (Angoulvant 2013)
- Dissatisfaction with initial visit (Augustine 2013)
- Anxious/ stressed carer (Logue 2013; Simmons 2012)
- Demographical data (Roback 1997)

*## Low social economic status (SES), including:*

- Living in low SES area (Callery et al. 2010)
- Insurance type (Jacobstein 2002; Liberman 2012)
- Public insurance (Zimmerman 1996)
- Insurance type (Berry 2013; Gregor 2009; LeDuc 2006)
- Carers' highest level of education (Gallagher 2013)

*+ Emergency crowding, including:*

- Timing of revisit (Alessandrini 2004)
- Same day discharges (Callery 2010)
- Weekend/ weekday (Jacobstein 2002)
- Arriving 3pm-11pm via private transportation (Easter.2012)
- Arrival in evening/ weekend hours (Goldman 2006; leDuc 2006)
- Arrival during overnight shift (Gallagher 2013)

*\*Symptoms of infectious diseases, including:*

- Feverish illnesses (Angoulvant 2013; Augustine 2013; Callery 2010; Easter 2012; Mintegui 2000)
- Initial diagnosis of URTI (Black 2010; Easter 2012; Hacking 2012)
- Gastroenteritis//diarrhoea/ dehydration/ vomiting (Berry 2013; Black 2010; Callery 2010; Easter 2012; Hacking 2012; Klein-Kremer 2011; LeDuc 2006; Simmons 2012)
- No adequate oral intake (Mansbach 2008)
- Temperature in triage (Klein-Kremer2011)

*\*\* Respiratory symptoms, including:*

- Respiratory related illnesses (Alessandrini 2004)
- Breathing difficulty (Callery 2010)
- Cough (Klein-Kremer 2011)
- Respiratory symptoms (Angoulvant 2013; Mintegui 2000)
- Respiratory diagnoses (Berry 2013; Hacking 2012; Zimmerman 1996)
- Specific respiratory symptoms, including:
  - Age-specific respiratory rates (Mansbach 2008; Roback 1997)
  - Severe retractions (Mansbach 2008; Roback 1997)
  - Initial oxygen saturation <94% (Mansbach 2008; Roback 1997)
  - More albuterol/epinephrine in first hour (Mansbach 2008; Roback 1997)
  - No adequate oral intake (Mansbach 2008)

*= Trauma/ surgery*

- Limping (Klein-Kremer 2011)
- Trauma (Alessandrini 2004)
- Minor trauma (Zimmerman 1996)
- Ventricular shunt procedures (Berry 2013)

*\$ Illness acuity, including:*

- Mild disease severity at ED index visit (Gregor 2009)
- Higher acuity in 2nd visit (Goldman 2011)

*^ Progression/ persistence of symptoms, including:*

- Prolonged fever (Klein-Kremer 2011)
- Impairment in child activities (Mistry 2007)

- Parental perception of illness (Lal 1999; Maguire 2011)
- Time elapsing from 1<sup>st</sup> visit – revisit (Goldman 2011)

~~ *Characteristics physician, including:*

- Treatment by physician versus intern (Jacobstein 2005)
- Physicians' year of experience/ training level (Gaucher 2012; Roback 1997)
- Attending physician versus resident (Chang 2008)
- Pediatrician vs Emergency physician (Seow 2007)

^^ *Diagnostic tests/ therapeutic intervention, including:*

- Obtaining blood cultures/ tests (Angoulvant 2013; Klein-Kremer 2011)
- Radiological assessment (Angoulvant 2013)
